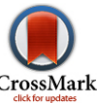

## Correction

# Correction: Optimal Attenuation of Experimental Autoimmune Encephalomyelitis by Intravenous Immunoglobulin Requires an Intact Interleukin-11 Receptor

The *PLOS ONE* Staff

There are errors in the author affiliations. The affiliations should appear as shown here:

Carlyn A. Figueiredo<sup>1,2</sup>, Paulina C. Drohomysky<sup>4</sup>, Stephen D. S. McCarthy<sup>1,2</sup>, Danila Leontyev<sup>1</sup>, Xue-Zhong Ma<sup>1</sup>, Donald R. Branch<sup>1,2,3\*</sup>, Shannon E. Dunn<sup>3,4,5\*</sup>

<sup>1</sup> Centre for Innovation, Canadian Blood Services, 67 College Toronto, Toronto, Ontario, Canada,

<sup>2</sup> Department of Laboratory Medicine and Pathobiology, University of Toronto, Toronto, Ontario, Canada,

<sup>3</sup> Toronto General Research Institute, University Health Network, Toronto, Ontario, Canada,

<sup>4</sup> Department of Immunology, University of Toronto, Toronto, Ontario, Canada,

<sup>5</sup> Women's College Research Institute, Toronto, Ontario, Canada

\* Email: don.branch@utoronto.ca (DRB); sdunn@uhnresearch.ca (SED)

These authors contributed equally to this work.

## Reference

1. Figueiredo CA, Drohomysky PC, McCarthy SDS, Leontyev D, Ma X-Z, et al. (2014) Optimal Attenuation of Experimental Autoimmune Encephalomyelitis by Intravenous Immunoglobulin Requires an Intact Interleukin-11 Receptor. *PLoS ONE* 9(7): e101947. doi:10.1371/journal.pone.0101947

**Citation:** The *PLOS ONE* Staff (2014) Correction: Optimal Attenuation of Experimental Autoimmune Encephalomyelitis by Intravenous Immunoglobulin Requires an Intact Interleukin-11 Receptor. *PLoS ONE* 9(11): e113001. doi:10.1371/journal.pone.0113001

**Published:** November 4, 2014

**Copyright:** © 2014 The *PLOS ONE* Staff. This is an open-access article distributed under the terms of the Creative Commons Attribution License, which permits unrestricted use, distribution, and reproduction in any medium, provided the original author and source are credited.
